# Supplementary material for: Non-conventional bulk heterojunction nanoparticle photocatalysts for sacrificial hydrogen evolution from water
Source: Royal Society of Chemistry journal article supplement (doi:10.1039/d4ta03584d), 2024-01-01
Supplement: d4ta03584d1.pdf [file d4ta03584d1.pdf]

# Supplementary Information

for

## Non-Conventional Bulk Heterojunction Nanoparticle Photocatalysts for Sacrificial Hydrogen Evolution from Water

Jai-Ram Mistry,<sup>a</sup> Ewan McQueen,<sup>b</sup> Fabio Nudelman,<sup>c</sup> Reiner Sebastian Sprick,<sup>b\*</sup> and  
Iain A. Wright<sup>c\*</sup>

<sup>a</sup> Department of Chemistry, School of Science, Loughborough University, Loughborough LE11 3TU, United Kingdom.

<sup>b</sup> Department of Pure and Applied Chemistry, University of Strathclyde, Thomas Graham Building, 295 Cathedral Street, Glasgow G1 1XL, United Kingdom. Email: [sebastian.sprick@strath.ac.uk](mailto:sebastian.sprick@strath.ac.uk)

<sup>c</sup> School of Chemistry, University of Edinburgh, Joseph Black Building, Edinburgh EH9 3FJ, United Kingdom. Email: [iain.wright@ed.ac.uk](mailto:iain.wright@ed.ac.uk)

# Contents

|                                                                           |            |
|---------------------------------------------------------------------------|------------|
| <b>General Experimental</b>                                               | <b>S3</b>  |
| <b>Structures of Y6 and ITIC</b>                                          | <b>S6</b>  |
| <b>Synthetic Methods</b>                                                  | <b>S7</b>  |
| <b><math>^1\text{H}</math> and <math>^{13}\text{C}</math> NMR Spectra</b> | <b>S15</b> |
| <b>Molecular weight and Optoelectronic Properties of PNF222</b>           | <b>S18</b> |
| <b>Optoelectronic Properties of DTSRh and DTS13</b>                       | <b>S19</b> |
| <b>Computational Results</b>                                              | <b>S20</b> |
| <b>Dynamic Light Scattering Results</b>                                   | <b>S26</b> |
| <b>Additional Photocatalysis Figures</b>                                  | <b>S28</b> |
| <b>References</b>                                                         | <b>S32</b> |

## General Experimental

**Synthesis and characterisation.** All reactants and reagents were purchased from commercial suppliers and used without further purification unless otherwise stated. *N*-Bromosuccinimide was recrystallised from water prior to use<sup>S1</sup> **PNF222** was purchased from Ossila (batch M2052A2). All reactions were performed under an inert atmosphere in oven dried glassware unless otherwise stated.

Column chromatography was carried out using silica gel (60, 40-60  $\mu\text{m}$  mesh Fluorochem). Analytical thin-layer chromatography was performed on precoated aluminium backed silica gel 60 F254 plates (Merck) and Macherey-Nagel ALUGRAM Alox N/UV254 aluminium backed plates (Fisher), which were approximately 2.5 cm  $\times$  5 cm in size and visualized using ultraviolet light (254/365 nm).

NMR spectra were recorded on Jeol ECS 400 MHz and Jeol ECZ 500 MHz spectrometers. Chemical shifts are reported in ppm downfield of tetramethylsilane (TMS) using TMS or the residual solvent as an internal reference. NMR spectra were processed using MestReNova. Multiplicities are reported as singlet (s), doublet (d), triplet (t), quartet (q) and multiplet (m).

IR spectra were collected on a Thermo Scientific Nicolet FTIR spectrometer.

High resolution mass spectrometry (HRMS) was measured on a Thermo-Finnigan LTQ FT mass spectrometer. Samples were prepared in MeCN or a 9:1 MeCN:CH<sub>2</sub>Cl<sub>2</sub> mixture.

UV-vis absorbance spectra were measured using a UV-1800 spectrophotometer (Shimadzu) and UVProbe version 2.33 software.

Emission spectra were recorded on a Horiba Fluoromax<sup>®</sup> 4 luminescence spectrometer using FluorEssence<sup>™</sup> software. Photo-luminescent quantum yields (PLQY) measurements were carried out relative to that of Rhodamine-6G (0.94 in ethanol<sup>S2</sup>).

Elemental analyses were obtained on an Exeter Analytical CE440 Elemental Analyser.

Melting points were determined in open-ended capillaries using a Stuart Scientific SMP10 melting point apparatus at a ramping rate of 1 °C/min. They are recorded to the nearest 1 °C and are uncorrected.

TGA were performed using a TA ST Q600 instrument. Two alumina crucibles with a small amount of sample (1–5 mg) and an equal ( $\pm 0.01$  mg) amount of alumina reference powder were used for the TGA and the temperature was increased at a rate of 10 °C/min from 25 °C to 1000 °C. Data obtained was analysed using TA Instruments Universal Analysis 2000 (Version 4.5A, Build 4.5.0.5) software.

Cyclic voltammetry was recorded in CH<sub>2</sub>Cl<sub>2</sub> solution using a Autolab Potentiostat (PGSTAT128) and NOVA 2.1 software with internal resistance compensation applied. A glassy carbon disk working electrode, Pt wire, and Ag/Ag<sup>+</sup> (0.1 M AgNO<sub>3</sub> in acetonitrile) were used as the working, counter, and reference electrodes, respectively. An analyte molarity of ca. 10<sup>-3</sup> M was employed in the presence of 10<sup>-1</sup> M (TBAPF<sub>6</sub>) as a supporting electrolyte. Solutions were degassed with Ar and experiments run under a blanket of Ar. The working electrode was polished between each experiment. Measurements were corrected to the half-wave potential of the ferrocene/ferrocenium (Fc/Fc<sup>+</sup>) redox couple as an internal standard. Ionisation potential (IP) and electron affinity (EA) values were approximated using the voltammetry results and are presented on the absolute electrochemical scale (0 V vs. standard hydrogen electrode (SHE) = -4.44 V vs. vacuum).<sup>S3</sup> The IP and EA were obtained by considering both the oxidation potential of Fc/Fc<sup>+</sup> in CH<sub>2</sub>Cl<sub>2</sub> (+0.46 V vs. SCE)<sup>S4</sup> and the fact that SCE has a potential of +0.24 V vs. SHE.<sup>S5</sup> The oxidation potential of Fc/Fc<sup>+</sup> can therefore be estimated as +0.70 V vs. SHE. According to the Nernst equation, a further adjustment of +0.12 V is required due to the catalysis occurring in a pH 2 solution. The IP and EA were then approximated using the onset of the oxidation ( $E_{\text{onset}}^{\text{ox}}$ ) or reduction ( $E_{\text{onset}}^{\text{red}}$ ) wave respectively from the cyclic voltammetry according to the formulas:

$$\text{IP} = -4.44 - (+0.70) - (+0.12) - E_{\text{onset}}^{\text{ox}}$$

$$\text{EA} = -4.44 - (+0.70) - (+0.12) - E_{\text{onset}}^{\text{red}}$$

Dynamic light scattering (DLS) measurements were carried out on a Malvern Zetasizer Nano. Nanoparticle dispersions were diluted by placing 50  $\mu\text{L}$  of 0.5 mg/mL dispersion in 3 mL of DI water (pre filtered through 0.45  $\mu\text{m}$  PTFE) prior to measurements. Measurements were performed in triplicate and averaged.

Density functional theory calculations were performed with Orca v 5<sup>S6</sup> using the B3LYP hybrid functional<sup>S7</sup> and def2-SVP basis set.<sup>S8,S9</sup>

**Preparation of photocatalyst nanoparticles.** To prepare the nanoparticles, individual stock solutions of **DTSRh**, **DTS13** and **PNF222** in chloroform solvent at a concentration of 0.50 mg mL<sup>-1</sup> were prepared. These solutions were heated overnight at 80 °C to ensure complete dissolution then allowed to cool before being filtered using a 0.45- $\mu\text{m}$  PTFE filter. The nanoparticle precursor solutions were created by mixing the stock solutions in the desired nanoparticle composition ratio with total volume of 10 mL. Subsequently, the nanoparticle precursor solution was added to a pre-prepared 0.5 wt. % solution of sodium dodecyl sulfate (SDS) surfactant in deionised water (10 mL) resulting in a bilayer. This mixture was vigorously stirred for 15 min at 40 °C to create a pre-emulsion, which was further subjected to sonication

for 20 min using an ultrasonic processor (Misonix Sonicator Ultrasonic Processor XL fitted with a 3 mm microtip) to form a mini emulsion. The mini-emulsion was heated at 85 °C under a stream of nitrogen with gentle stirring to remove the chloroform, leaving a surfactant-stabilised nanoparticle dispersion in water. Finally, the dispersion was filtered (0.45- $\mu\text{m}$  PTFE) to remove any large aggregates before being stored in an amber vial to avoid over exposure to light.

**Hydrogen evolution measurements.** Hydrogen evolution from **DTSRh**, **DTS13** and **PNF222** nanoparticles was measured using ascorbic acid as the sacrificial hole scavenger and platinum as the co-catalyst. **DTSRh**, **DTS13** and **PNF222** nanoparticles with varying ratios of each component (2 mg from a 0.5 mg mL<sup>-1</sup> dispersions) loaded with 10% platinum (1.25 mL from a 0.4 mg mL<sup>-1</sup> aqueous potassium hexachloroplatinate solution) were made up to 25 mL total volume using an ascorbic acid solution (0.2 M) in a quartz flask with stirrer. The flask was degassed with nitrogen and irradiated with a 300 W Xe Oriel light source fitted with an AM1.5G filter. The hydrogen evolution rates were determined by taking gas from the head space at regular intervals and running these on a gas chromatograph (Thermo Scientific Trace 1300) equipped with a molecular sieve column. The amounts of hydrogen being produced were then calculated by using an external calibration.

**Cryo-transmission electron microscopy (CryoTEM).** R2/2 Quantifoil cryoTEM Au grids (Quantifoil Micro Tools GmbH) were plasma-treated for 1 minute using a Pelco Glow Discharge system. Solutions of **DTSRh:PNF222** (1:1) and **DTS13:PNF222** (1:1) were prepared as described above and were added in aliquots of 3  $\mu\text{L}$  to the grid then plunge-frozen in liquid ethane using a vitrification robot (FEI Vitrobot Mark IV), at 21 °C and 100% humidity. CryoTEM imaging was done on a FEI Tecnai F20 transmission electron microscope operating at 200 kV, equipped with a Gatan cryoholder at -170 °C. Images were recorded using a Gatan CMOS Rio camera.

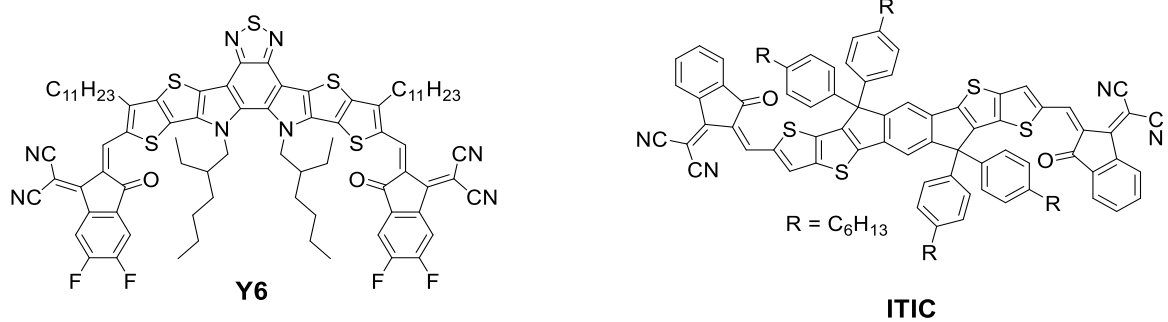

**Figure S1:** Molecular structures of **Y6** and **ITIC**



### 3,3',5,5'-Tetrabromo-2,2'-bithiophene (**2**)

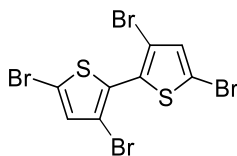

In a foil wrapped flask, *N*-bromosuccinimide (23.7 g, 130.7 mmol) was added portion wise to a solution of 2,2'-bithiophene (4.94 g, 29.7 mmol) in a mixture of CHCl<sub>3</sub> (40 mL) and glacial AcOH (40 mL) over a period of 3 hours. The brick red mixture obtained was left to stir overnight at room temperature. The solvent was removed under vacuum and the resulting solid was collected and washed first with a saturated NaHCO<sub>3</sub> solution (100 mL) and then *n*-hexane (100 mL) to yield a white powder. The crude product was recrystallised from boiling chloroform to yield **2** as an off-white crystalline solid (10.2 g, 71%). Mp. 140-142 °C. (Lit 139-140 °C).<sup>S12</sup>

Characterisation in agreement with literature.<sup>S12</sup>

<sup>1</sup>H NMR (400 MHz, CDCl<sub>3</sub>-*d*, ppm) δ = 7.05 (2H, s).

<sup>13</sup>C NMR (100 MHz, CDCl<sub>3</sub>-*d*, ppm) δ = 133.1, 129.7, 115.0, 112.3.



### 3,3'-Dibromo-5,5'-bis(trimethylsilyl)-2,2'-bithiophene (3)

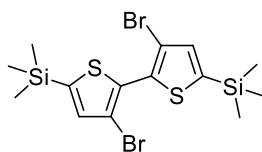

Compound **2** (5.00 g, 10.4 mmol) was dissolved in dry Et<sub>2</sub>O (50 mL) and the resulting solution was cooled to -78 °C using an acetone/dry ice bath. *n*-BuLi (2.5 M in hexanes, 8.7 mL, 21.8 mmol) was added dropwise over 5 minutes and the reaction was left for 2 hours at -78 °C. Chlorotrimethylsilane (2.37 mL, 21.77 mmol) was then added dropwise, and the reaction was left to stir at -78 °C for a further 15 minutes before the reaction mixture was allowed to warm to room temperature and stirred overnight. The reaction mixture was then poured on to cold water (100 mL) and extracted into Et<sub>2</sub>O (3 × 30 mL). The combined organic layers were washed with brine (50 mL) and dried over MgSO<sub>4</sub> before the removal of the solvent under reduced pressure to yield the crude product as a purple oil. Purification was achieved using flash column chromatography (SiO<sub>2</sub>; 100% *n*-hexane; R<sub>f</sub> = 0.49) to give **3** as a light yellow waxy solid (3.30 g, 68%). Mp. 86-87 °C. (Lit 87-88 °C).<sup>S14</sup>

The characterisation obtained was in good in agreement with literature.<sup>S15</sup>

<sup>1</sup>H NMR (500 MHz, CDCl<sub>3</sub>-*d*, ppm) δ = 7.15 (2H, s), 0.34 (18H, s).

<sup>13</sup>C (100 MHz, CDCl<sub>3</sub>-*d*, ppm) δ = 143.3, 137.4, 134.3, 113.3, 0.27.

**4,4-dihexyl-2,6-bis(trimethylsilyl)-4*H*-silolo[3,2-*b*:4,5-*b'*] dithiophene (4)**

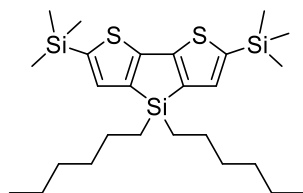

*n*-BuLi (1.90 mL, 2.5 M in hexanes 4.69 mmol) was added dropwise to a solution of **3** (1.00 g, 2.13 mmol) in anhydrous THF (20 mL) under argon at  $-78\text{ }^{\circ}\text{C}$  *via* an acetone/dry ice bath. The resulting mixture was stirred for a further 30 minutes at this temperature before dichlorodihexylsilane (0.67 mL, 2.55 mmol) was added in one portion and the mixture was warmed to room temperature and left to stir 2 hours. After this period the mixture was quenched with water and extracted into Et<sub>2</sub>O (3 × 20 mL). The combined organics were collected, dried over MgSO<sub>4</sub> and solvent was removed under reduced pressure. The crude solid was purified with flash column chromatography (SiO<sub>2</sub>; 100% *n*-hexane;  $R_f = 0.77$ ) to yield **4** as a colourless oil (0.74 g, 65%).

Characterisation in agreement with literature.<sup>S15</sup>

<sup>1</sup>H NMR (400MHz, CDCl<sub>3</sub>-*d*, ppm)  $\delta = 7.12$  (s, 2H), 1.45-1.35 (m, 4H), 1.33-1.21 (m, 16H), 0.90-0.84 (m, 6H), 0.33 (s, 18H).

<sup>13</sup>C NMR (100 MHz, CDCl<sub>3</sub>-*d*, ppm)  $\delta = 154.6, 144.1, 141.2, 136.8, 33.0, 31.6, 24.4, 22.7, 14.2, 12.1, 0.3$ .

HRMS (ESI):  $m/z$  calcd for C<sub>26</sub>H<sub>46</sub>S<sub>2</sub>Si<sub>3</sub>: 506.2343 [M<sup>+</sup>]. Found: 506.2342.

**2,6-dibromo-4,4-dihexyl-4*H*-silolo[3,2-*b*:4,5-*b'*] dithiophene (5)**

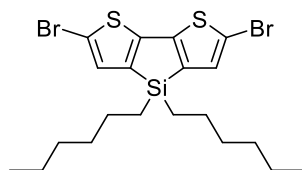

In a foil wrapped flask *N*-Bromosuccinimide (0.52 g, 2.91 mmol) was added to a solution of **4** (0.74 g, 1.46 mmol) in THF (40 mL) at 0 °C, the mixture was warmed to room temperature and stirred overnight. The resulting clear yellow solution was extracted into Et<sub>2</sub>O (3 × 30 mL), dried over MgSO<sub>4</sub> and evaporated to dryness to yield a yellow residue which was purified using flash column chromatography (SiO<sub>2</sub>; 100% *n*-hexane; *R<sub>f</sub>* = 0.84) to yielding **5** as a yellow/green oil (0.61 g, 80%).

Characterisation in agreement with literature.<sup>S15</sup>

<sup>1</sup>H NMR (400MHz, CDCl<sub>3</sub>-*d*, ppm) δ = 7.00 (s, 2H), 1.35-1.22 (m, 16H), 0.89-0.84 (m, 10H).

<sup>13</sup>C NMR (100 MHz, CDCl<sub>3</sub>-*d*, ppm) δ = 149.1, 141.2, 132.3, 111.6, 32.9, 31.5, 24.1, 22.7, 14.2, 11.8.

HRMS (ESI): *m/z* calcd for C<sub>20</sub>H<sub>28</sub>Br<sub>2</sub>S<sub>2</sub>Si: 520.9763 [M<sup>+</sup>]. Found: 520.9761.

#### 4,4'-(4,4-dihexyl-4*H*-silolo[3,2-*b*:4,5-*b'*]dithiophene-2,6-diyl)dibenzaldehyde (**6**)

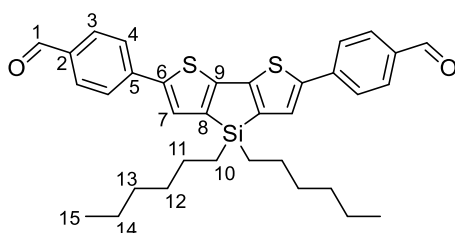

A solution of **5** (0.98 g, 1.88 mmol), 4-formylphenylboronic acid (0.62 g, 4.41 mmol),  $K_2CO_3$  (1.55 g, 11.3 mmol) in a toluene: ethanol:  $H_2O$  (20 :3:3 mL) and degassed with argon for 1 hour.  $Pd(PPh_3)_4$  (22 mg, 0.18 mmol) was added and the mixture was degassed for a further 15 minutes before being heated to 65 °C for 18 hours. The mixture was then cooled to room temperature and diluted with  $H_2O$  (30 mL). It was then extracted into  $CH_2Cl_2$  (3 × 40 mL) and the organics were collected, dried over  $MgSO_4$ , and evaporated to dryness to yield a crude dark brown oil which was purified using flash column chromatography ( $SiO_2$ ; 100%  $CH_2Cl_2$ ;  $R_f = 0.36$ ) to yield **6** as bright orange solid which was recrystallised in *n*-hexane:  $CH_2Cl_2$  (0.60 g, 56 %). Mp. 114-115 °C.

$^1H$  NMR (400MHz,  $CDCl_3$ -*d*, ppm)  $\delta = 10.00$  (s, 2H,  $CHO$ ), 7.89 (d, 4H,  $ArH^3$ ,  $J = 8.4$  Hz), 7.76 (d, 2H,  $ArH^4$ ,  $J = 8$  Hz), 7.47 (s, 2H, Thio-H), 1.46-1.23 (m, 16H), 0.98 (q, 4H,  $-Si-CH_2$ ,  $J = 8$ , 7.6, 5.6 Hz), 0.85 (t, 6H,  $-CH_3$ ,  $J = 6.4$ , 7.2 Hz).

$^{13}C$  NMR (400 MHz,  $CDCl_3$ -*d*, ppm)  $\delta = 191.4$  (C1), 150.2 (C9), 144.3 (C8), 140.4 (6), 134.9 (C2), 130.6 (C3), 128.0 (C7), 125.8 (C4), 125.6 (C5), 32.9 (C13), 31.5 (31.5), 24.2 (C11/CC12), 22.6 (C11/C12), 14.1 (C15), 11.9 (C10).

Elemental analysis: Calculated for  $C_{34}H_{38}O_2S_2Si$ : 71.53 C%, 6.71 H%, 0.00 N%, Experimental 71.50 C%, 6.80 H%, 0.21 N%.

HRMS (ESI):  $m/z$  calcd for  $C_{34}H_{38}O_2S_2Si$ : 570.2077 [M+]. Found: 570.2076.

IR ( $\nu_{max}/cm^{-1}$ ): 2918 (C-H), 2848 (C-H), 1692 (C=O), 1594 (C=C, Ar), 1560 (C=C, Ar), 1513 (C=C, Ar), 1308, 1210 (Si-C), 1181, 1162, 1104, 1042.

**(5Z,5'Z)-5,5'-(((4,4-dihexyl-4H-silolo[3,2-b:4,5-b']dithiophene-2,6-diyl)bis(4,1-phenylene))bis(methanylylidene))bis(3-ethyl-2-thioxothiazolidin-4-one) (DTSR<sub>h</sub>)**

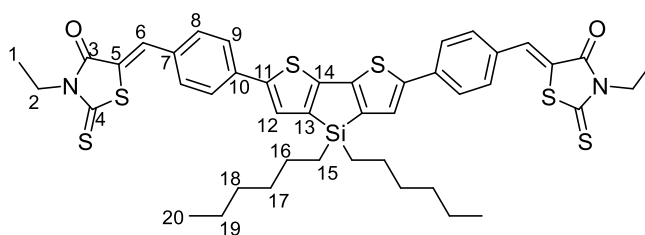

To a solution of dialdehyde (**6**) (0.10 g, 0.22 mmol) and *N*-ethylrhodanine (0.11 g, 0.65 mmol) in CHCl<sub>3</sub> (15 mL) in a foil wrapped round bottom flask, one drop of piperidine was added. The resulting solution was heated under reflux for 18 hours. After cooling to room temperature, the solvent volume was reduced to *circa* 5 mL and MeOH (20 mL) was added. The resulting precipitate was collected and purified using flash column chromatography (SiO<sub>2</sub>; 100% CH<sub>2</sub>Cl<sub>2</sub>; R<sub>f</sub> = 0.88) to yield a deep red solid which was further purified by dissolving in a minimum amount of CH<sub>2</sub>Cl<sub>2</sub> and triturating in MeOH, then in *n*-hexane and cooling to -18 °C in a freezer. The resulting deep red precipitate was collected and dried under vacuum to yield **DTSR<sub>h</sub>** (40 mg, 21%). Mp: 215-216 °C.

<sup>1</sup>H NMR (400MHz, CDCl<sub>3</sub>-*d*, ppm) δ = 7.67 (4H, C=CH, 2H Ar-H, overlapping), 7.47 (4H, Ar-H, d, J = 8.7 Hz), 7.42 (2H, Thio-H, s), 4.20 (4H, N-CH<sub>2</sub>, q, J = 7.1 Hz), 1.48-1.25 (22H, m), 0.98 (4H, Si-CH<sub>2</sub>, t, J = 8.0 Hz), 0.86 (6H, CH<sub>2</sub>-CH<sub>3</sub>, t, J = 6.8 Hz).

<sup>13</sup>C NMR (126 MHz, CDCl<sub>3</sub>-*d*, ppm) δ = 192.9 (C4), 167.7 (C3), 149.9 (C14), 144.7 (C7), 144.4 (C13), 136.8 (C11), 132.4 (C8), 132.0 (C10), 131.6 (C9), 127.6 (C12), 126.1 (C6), 122.5 (C5), 40.0 (C2), 33.0 (C16/C17), 31.6 (C18/C19), 24.3 (C16/C17), 22.7 (C18/C19), 14.2 (C20), 12.4 (C1), 12.0 (C15).

Elemental analysis: Calculated for C<sub>44</sub>H<sub>48</sub>N<sub>2</sub>O<sub>2</sub>S<sub>6</sub>Si: 61.64 C%, 5.64 H%, 3.27 N%, Experimental 61.61 C%, 5.32H%, 3.27 N%.

HRMS (ESI): *m/z* calcd for C<sub>44</sub>H<sub>48</sub>N<sub>2</sub>O<sub>2</sub>S<sub>6</sub>Si: 856.1804 [M+]. Found: 856.1798.

IR (*v*<sub>max</sub>/cm<sup>-1</sup>): 2920 (C-H), 2851 (C-H), 1698(C=O), 1578 (C=C), 1547 (C=C, Ar), 1514 (C=C, Ar), 1381, 1346, 1327, 1244 (Si-C), 1223 (C-N), 1169 (C-N), 1133 (C=S), 1103 (C=S).

**2,2'-(((4,4-dihexyl-4*H*-silolo[3,2-*b*:4,5-*b'*]dithiophene-2,6-diyl)bis(4,1-phenylene))bis(methanylylidene))bis(1*H*-indene-1,3(2*H*)-dione) (DTS13)**

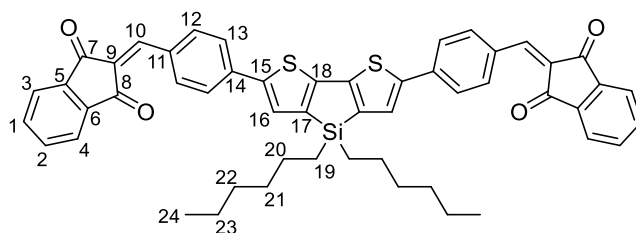

To a solution of dialdehyde (**6**) (0.10 g, 0.18 mmol,) and 1,3-indandione (0.10 g, 0.70 mmol) in  $\text{CHCl}_3$  (5 mL) in a foil wrapped round bottom flask, one drop of pyridine was added. The resulting solution was heated under reflux for 18 hours. After cooling to room temperature, MeOH (50 mL) was added, and the resulting precipitate was collected and was purified using flash column chromatography ( $\text{SiO}_2$ ; 100%  $\text{CHCl}_3$ ;  $R_f = 0.50$ ) to yield a deep purple solid which was further purified by dissolving in a minimum amount of  $\text{CH}_2\text{Cl}_2$  then triturating in MeOH, then *n*-hexane and cooling to  $-18\text{ }^\circ\text{C}$  in a freezer. The resulting deep purple was collected by filtration was washed with MeOH to yield **DTS13**. (65 mg, 45%). Mp. 227-228  $^\circ\text{C}$ .

$^1\text{H}$  NMR (400MHz,  $\text{CDCl}_3$ -*d*, ppm)  $\delta$  = 8.48 (4H, Ar-H, d,  $J$  = 8.7 Hz), 8.00-7.96 (4H, indan Ar-H, m), 7.80-7.76 (2H, C=CH, 4H indan Ar-H, m), 7.69 (4H, Ar-H,d,  $J$  = 8.7 Hz), 7.51 (2H, Thio-H, s), 1.49-1.42 (4H, -CH<sub>2</sub>-CH<sub>3</sub>, m), 1.39-1.33 (4H, m), 1.28-1.26 (8H, m), 1.02-0.98 (4H, Si-CH<sub>2</sub>, q,  $J$  = 8.0 Hz), 0.87 (6H, -CH<sub>3</sub>, t,  $J$  = 6.8 Hz).

$^{13}\text{C}$  NMR (126 MHz,  $\text{CDCl}_3$ -*d*, ppm)  $\delta$  = 190.6 (C7/8), 189.3 (C7/8), 150.5 (C18), 146.0 (C15), 145.1 (C10), 144.6 (C17), 142.7 (C5/6), 140.2 (C5/6), 139.2 (C13), 135.4 (C12), 135.4 (C3/4), 135.2 (C3/4), 132.1 (C11), 128.4 (C9), 128.1 (C16), 125.4 (C13), 123.4 (C1/2), 123.3 (C1/2), 33.1 (-CH<sub>2</sub>-), 31.6 (-CH<sub>2</sub>-), 24.3(-CH<sub>2</sub>-), 22.7(-CH<sub>2</sub>-), 14.3 (C24), 12.0 (C19).

Elemental analysis: Calculated for  $\text{C}_{52}\text{H}_{46}\text{O}_4\text{S}_2\text{Si}$ : 75.51 C%, 5.61 H%, 0.00 N%, Experimental 75.14 C%, 5.20 H%, 0.12 N%.

HRMS (ESI):  $m/z$  calcd for  $\text{C}_{52}\text{H}_{46}\text{O}_4\text{S}_2\text{Si}$ : 826.2601 [M+]. Found: 826.2597.

IR ( $\nu_{\text{max}}/\text{cm}^{-1}$ ): 2916 (C-H), 2849 (C-H), 1674 (C=O), 1561 (C=C), 1541 (C=C, Ar), 1511 (C=C, Ar), 1458 (C=C, Ar), 1422, 1345, 1319, 1250 (Si-C), 1213, 1184, 1151, 1019.

# $^1\text{H}$ and $^{13}\text{C}$ NMR Spectra

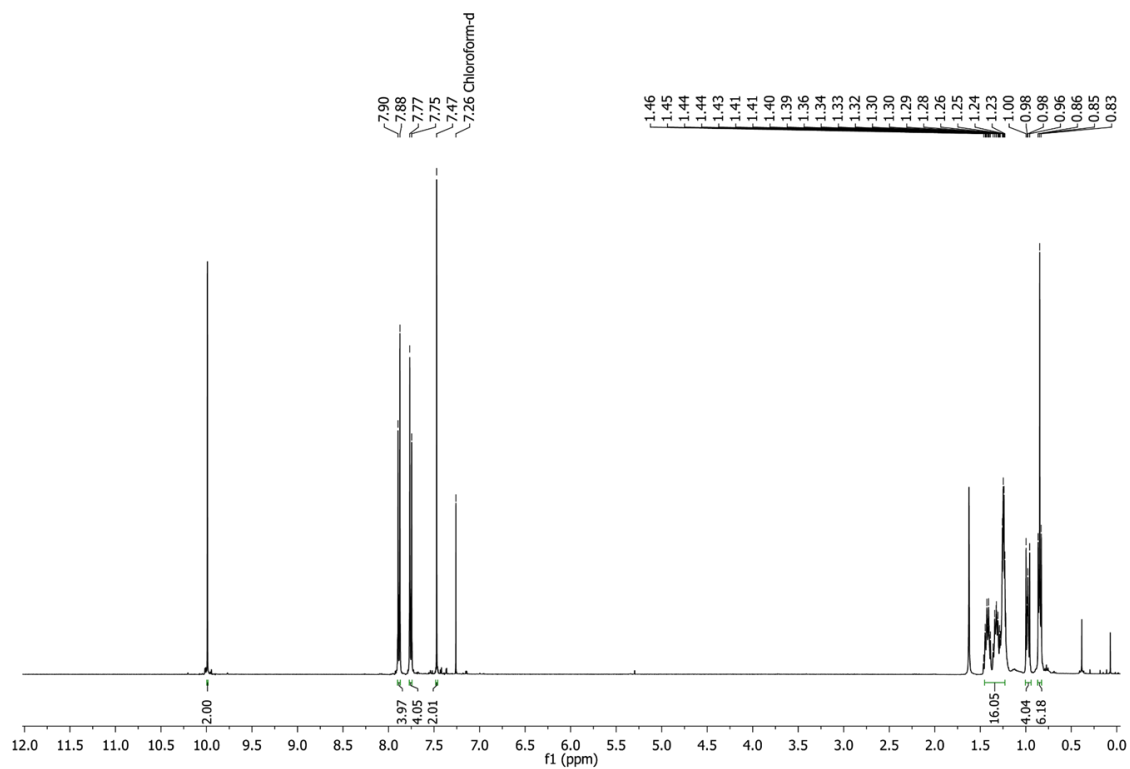

Spectrum S1:  $^1\text{H}$  NMR spectrum for **6**.

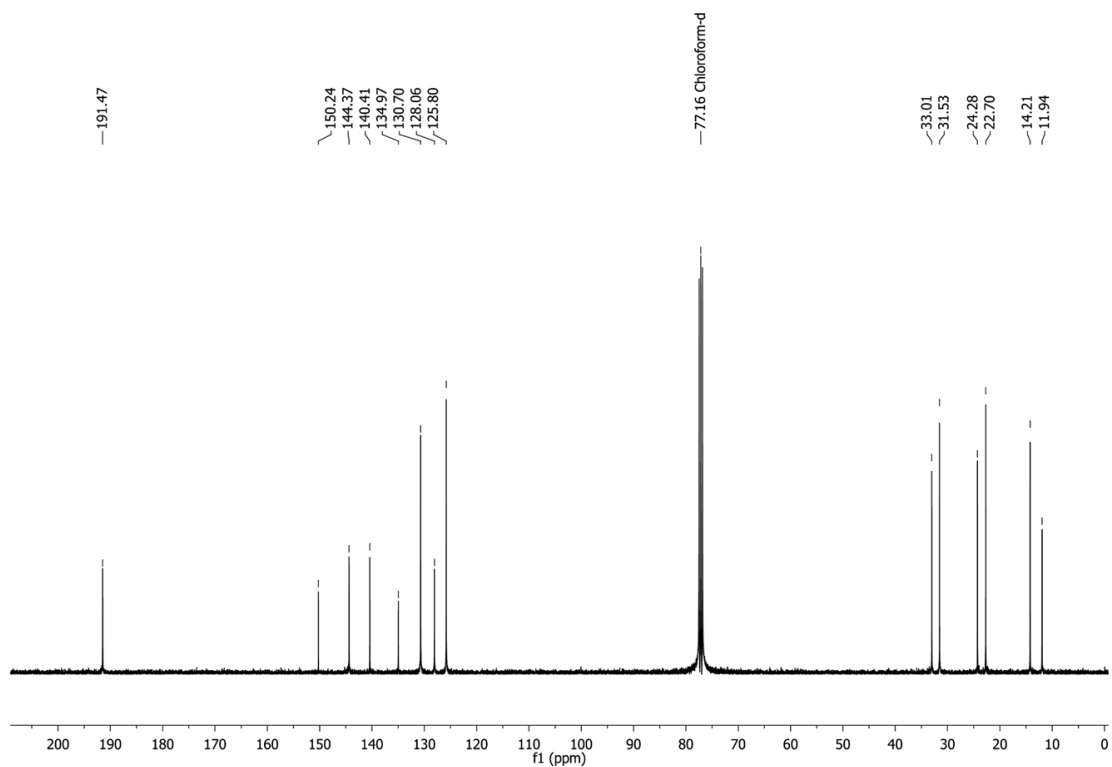

Spectrum S2:  $^{13}\text{C}$  NMR spectrum for **6**.

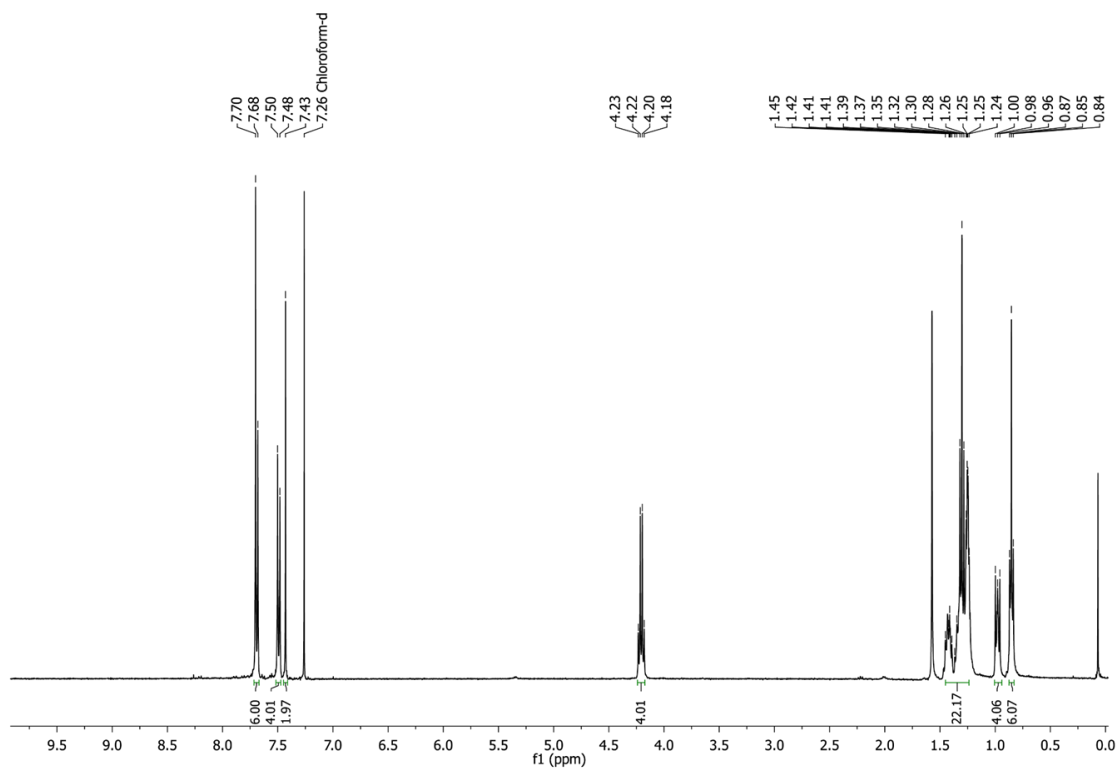

**Spectrum S3:**  $^1\text{H}$  NMR spectrum for DTSRh.

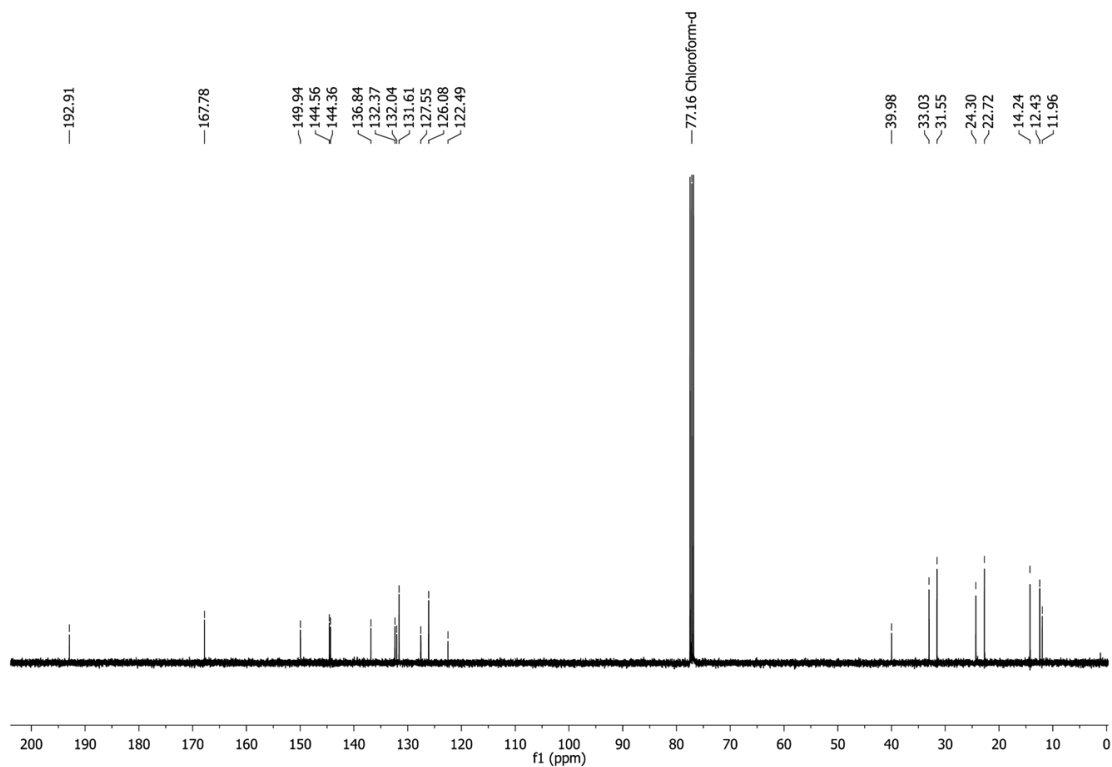

**Spectrum S4:** DTSRh  $^{13}\text{C}$  NMR spectrum for DTSRh.



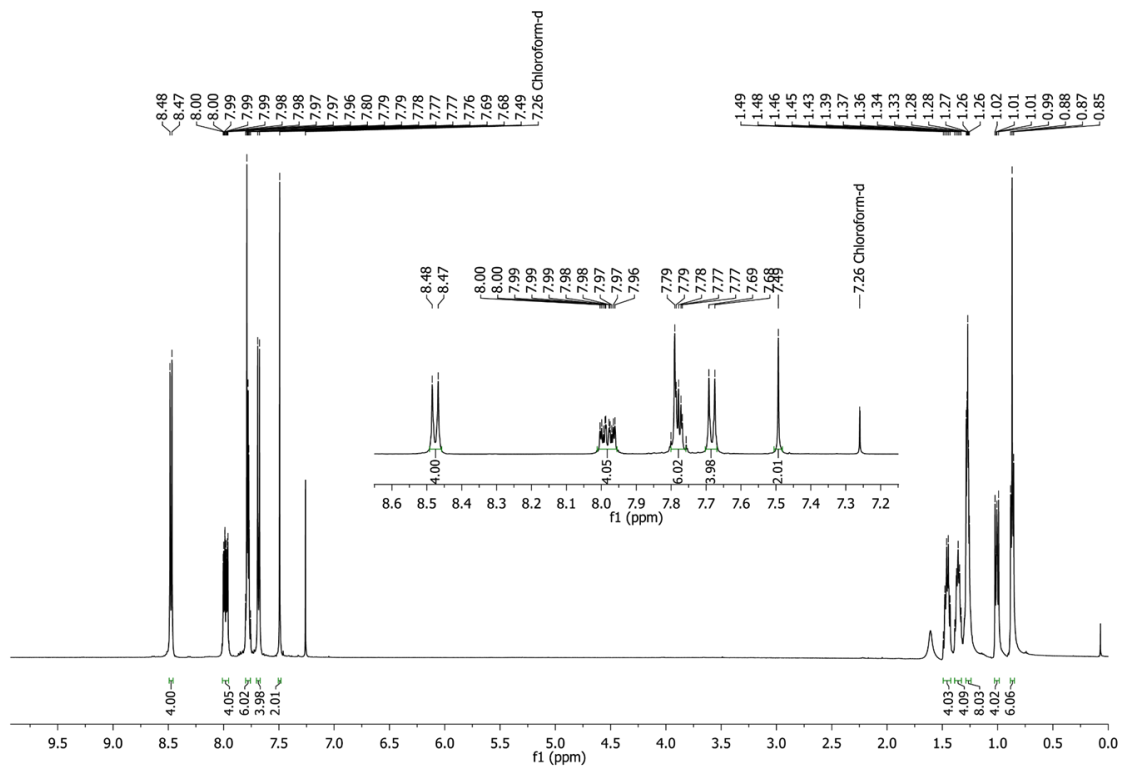

Spectrum S5:  $^1\text{H}$  NMR spectrum for DTS13.

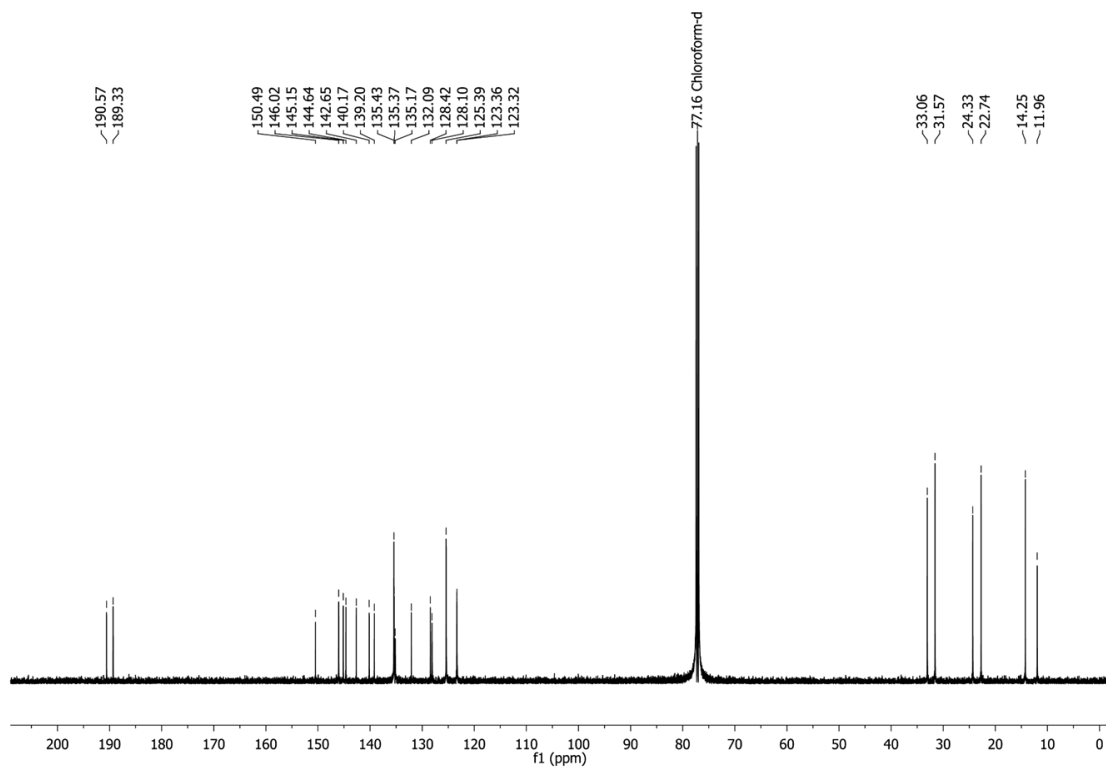

Spectrum S6:  $^{13}\text{C}$  NMR spectrum for DTS13.

# Molecular Weight and Optoelectronic Properties of PNF222

**Table S1:** Summary of molecular weight and the optical and electrochemical properties of polymer **PNF222** as purchased (Ossila, batch M2052A2).

| $M_w / M_n$ (PDI) <sup>a</sup> | IP<br>(eV)                                 | EA<br>(eV)                                 | $\lambda_{\max}^{\text{film}}$<br>(nm) | $\lambda_{\max}^{\text{soln}}$<br>(nm) | $E_g^{\text{opt}}$<br>(eV) |
|--------------------------------|--------------------------------------------|--------------------------------------------|----------------------------------------|----------------------------------------|----------------------------|
| 163,267 / 81,850<br>(1.99)     | -6.03 <sup>b</sup><br>(-5.99) <sup>c</sup> | -4.14 <sup>b</sup><br>(-3.90) <sup>c</sup> | 695                                    | 681                                    | 1.68 <sup>d</sup>          |

<sup>a</sup> Data from the Ossila website.<sup>S16</sup> <sup>b</sup> Experimentally measured in 0.1 M TBAPF<sub>6</sub> in acetonitrile with a conventional three-electrode configuration employing a platinum wire as a counter electrode, Ag/Ag<sup>+</sup> electrode as a reference electrode and drop cast films of **PNF222** on ITO as a working electrode at 0.1 Vs<sup>-1</sup> <sup>c</sup> Brackets indicate literature values. Taken from Ref. 17 <sup>d</sup> Determined by the solution UV-vis absorption onset using  $E_g^{\text{opt}} = 1240/\lambda_{\text{onset}}$

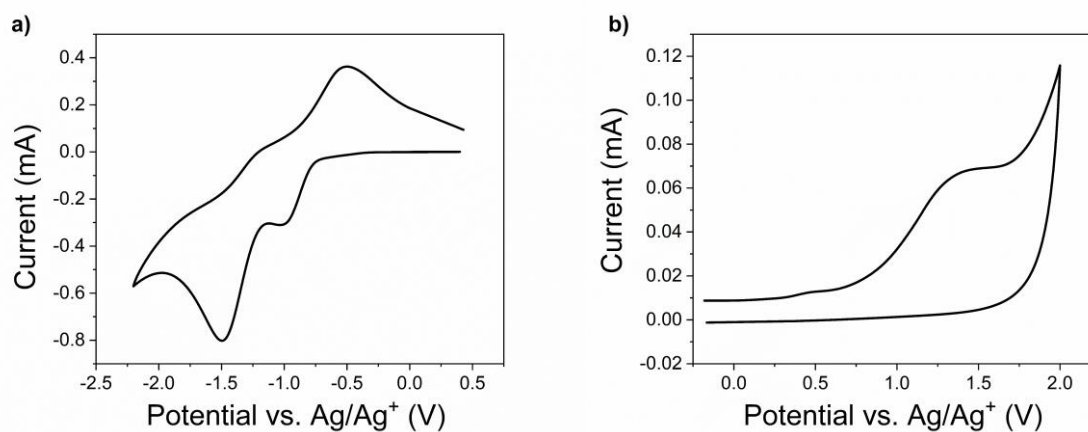

**Figure S2:** Cyclic voltammetry of **PNF222** showing a) reduction and b) oxidation.

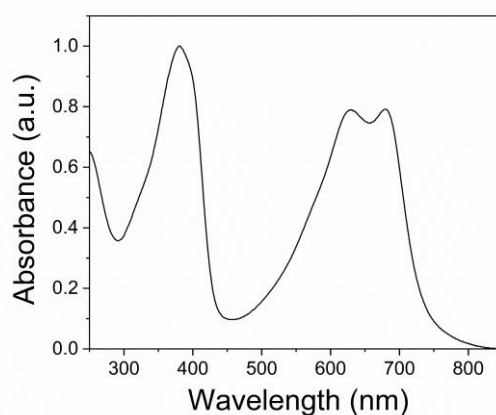

**Figure S3:** Solution state UV-vis spectra of **PNF222** in CHCl<sub>3</sub> at 10<sup>-5</sup> M.

## Optoelectronic Properties of DTSRh and DTS13

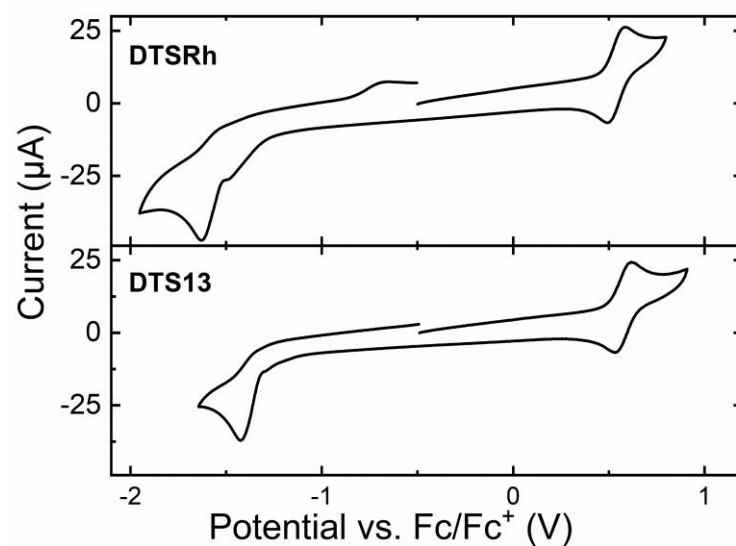

**Figure S4** Cyclic voltammetry for **DTSRh** (upper) and **DTS13** (lower).

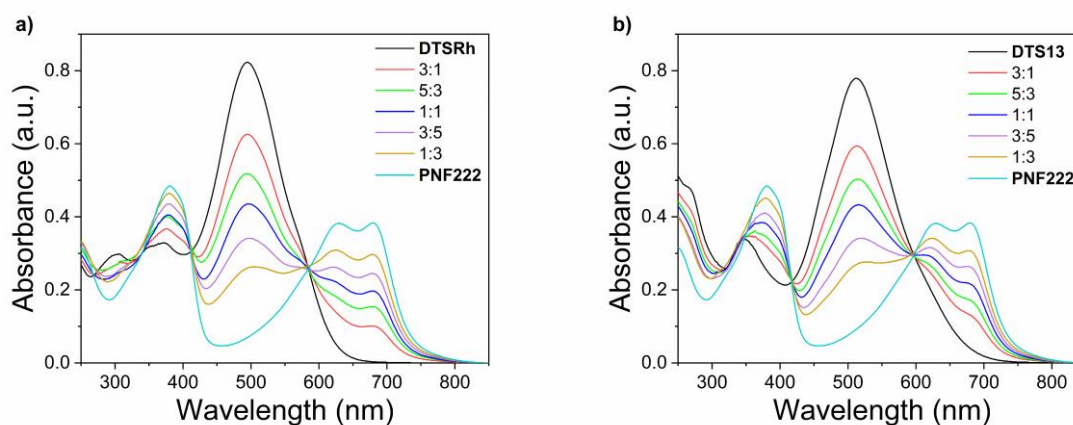

**Figure S5** Solution phase UV/vis titrations of (a) **DTSRh** and (b) **DTS13** with **PNF222**

**Table S2:** UV/vis and cyclic voltammetry results for **DTSRh** and **DTS13**.

|              | $\lambda_{\max}$ (nm) | $\log \varepsilon$ | $E_g^{\text{opt}}$<br>(eV) <sup>a</sup> | $E_g^{\text{calc}}$<br>(eV) <sup>b</sup> | $E^{\text{ox}}$<br>(V) <sup>c</sup> | $E^{\text{rd}}$<br>(V) <sup>c</sup> |
|--------------|-----------------------|--------------------|-----------------------------------------|------------------------------------------|-------------------------------------|-------------------------------------|
| <b>DSTRh</b> | 510                   | 4.91               | 2.14                                    | 2.493                                    | +0.54                               | -1.63 <sup>irr</sup>                |
| <b>DTS13</b> | 540                   | 4.89               | 2.02                                    | 2.425                                    | +0.57                               | -1.42 <sup>irr</sup>                |

<sup>a</sup> $E_g^{\text{opt}} = 1240.68/\lambda_{\text{onset}}$ . <sup>b</sup> $E_g^{\text{calc}}$  obtained from DFT. <sup>c</sup>Reversible reductions are quoted as  $E_{\text{half}}$  otherwise peak potentials are provided.

<sup>irr</sup> Irreversible peak

## Computational Results

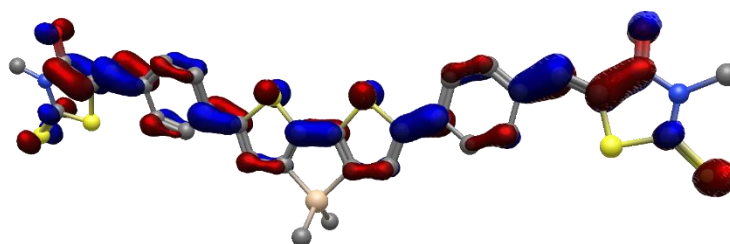

LUMO = -2.892 eV

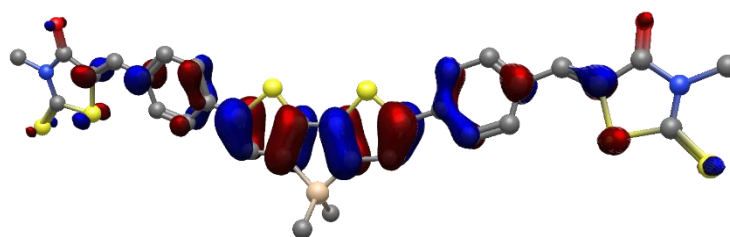

HOMO = -5.385 eV

**Figure S6** DFT Optimised molecular structure and frontier orbital distributions for **DTSRh**. The ethyl chains on the terminal rhodanines and the *n*-hexyl chains of the central Si atom were replaced with methyl groups to reduce the computational cost.

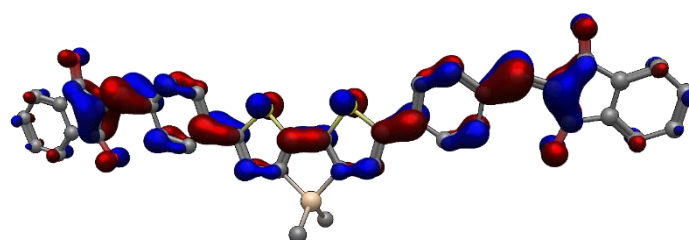

LUMO = -2.962 eV

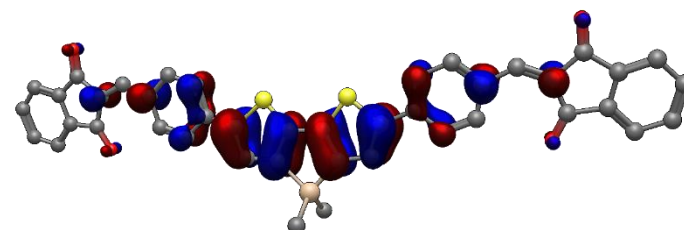

HOMO = -5.387 eV

**Figure S7** DFT Optimised molecular structure and frontier orbital distributions for **DTS13**. The *n*-hexyl chains of the central Si atom were replaced with methyl groups to reduce the computational cost.

## Cartesian Coordinates for DTSRh

|     |               |               |               |
|-----|---------------|---------------|---------------|
| C1  | 1.5306900000  | -0.5266400000 | -2.7676100000 |
| Si2 | 2.7119100000  | -1.2592600000 | -1.4945400000 |
| C3  | 2.1349400000  | -2.9651500000 | -0.9355100000 |
| C4  | 4.5287000000  | -1.2185900000 | -2.0478700000 |
| C5  | 5.3859000000  | -1.7393900000 | -3.0473400000 |
| C6  | 6.7113400000  | -1.3295200000 | -2.9389500000 |
| C7  | 7.8528900000  | -1.6791400000 | -3.7810200000 |
| C8  | 7.7400500000  | -2.6653800000 | -4.7896000000 |
| C9  | 8.8187500000  | -3.0145800000 | -5.5900800000 |
| C10 | 10.0835000000 | -2.4003100000 | -5.4286600000 |
| C11 | 11.2653700000 | -2.7137200000 | -6.2090800000 |
| C12 | 10.1930100000 | -1.4125000000 | -4.4221200000 |
| C13 | 9.1137600000  | -1.0601100000 | -3.6244000000 |
| S14 | 6.9035800000  | -0.2635700000 | -1.5502400000 |
| C15 | 5.2238700000  | -0.3930800000 | -1.1595700000 |
| C16 | 4.4569400000  | 0.2049800000  | -0.0859200000 |
| C17 | 3.0914500000  | -0.0920300000 | -0.0445600000 |
| C18 | 2.4567400000  | 0.5456800000  | 1.0490800000  |
| C19 | 3.3077200000  | 1.3134500000  | 1.8375300000  |
| C20 | 2.9982700000  | 2.0866200000  | 3.0379800000  |
| C21 | 1.6611100000  | 2.3980700000  | 3.3794900000  |
| C22 | 1.3531500000  | 3.1155900000  | 4.5273100000  |
| C23 | 2.3666100000  | 3.5713000000  | 5.4035400000  |
| C24 | 2.1350300000  | 4.3157400000  | 6.6267600000  |
| C25 | 3.7030500000  | 3.2675700000  | 5.0536300000  |
| C26 | 4.0114800000  | 2.5470200000  | 3.9086000000  |
| S27 | 4.9474000000  | 1.2526000000  | 1.1999700000  |
| H28 | 1.8650100000  | 0.4721400000  | -3.0891800000 |
| H29 | 1.4692000000  | -1.1720000000 | -3.6599900000 |
| H30 | 1.1325200000  | -2.9075800000 | -0.4789200000 |
| H31 | 2.8257600000  | -3.3916200000 | -0.1913600000 |
| H32 | 5.0492000000  | -2.4001700000 | -3.8478400000 |
| H33 | 6.7894900000  | -3.1792800000 | -4.9418700000 |
| H34 | 8.6698000000  | -3.7855000000 | -6.3476700000 |
| C35 | 11.4765800000 | -3.6014700000 | -7.2164200000 |

|     |               |               |                |
|-----|---------------|---------------|----------------|
| H36 | 11.1544400000 | -0.9142400000 | -4.2713400000  |
| H37 | 9.2497300000  | -0.2853000000 | -2.8655500000  |
| H38 | 1.3961700000  | 0.4359200000  | 1.2827200000   |
| H39 | 0.8476900000  | 2.0847300000  | 2.7226100000   |
| H40 | 0.3036300000  | 3.3268400000  | 4.7374500000   |
| C41 | 0.9934900000  | 4.7591900000  | 7.2158600000   |
| H42 | 4.5112100000  | 3.6028600000  | 5.7090600000   |
| H43 | 5.0582600000  | 2.3197700000  | 3.6917600000   |
| H44 | 0.5132500000  | -0.4315000000 | -2.3527100000  |
| H45 | 2.0744000000  | -3.6615900000 | -1.7886600000  |
| S46 | -0.6890300000 | 4.6131100000  | 6.7067600000   |
| C47 | 1.0681900000  | 5.5028500000  | 8.5036200000   |
| C48 | -1.2805900000 | 5.5022100000  | 8.1301300000   |
| S49 | -2.8716000000 | 5.8041900000  | 8.3998700000   |
| N50 | -0.2241200000 | 5.8736100000  | 8.9256200000   |
| O51 | 2.0758500000  | 5.7660500000  | 9.1238500000   |
| C52 | -0.4139800000 | 6.6183500000  | 10.1627800000  |
| H53 | -1.0185300000 | 6.0320800000  | 10.8711100000  |
| H54 | -0.9436600000 | 7.5602700000  | 9.9580700000   |
| H55 | 0.5806700000  | 6.8157000000  | 10.5806800000  |
| C56 | 12.8293300000 | -3.7185300000 | -7.8275100000  |
| S57 | 10.3705300000 | -4.7372200000 | -7.9908900000  |
| H58 | 12.1662800000 | -2.1447400000 | -5.9519100000  |
| C59 | 11.6376300000 | -5.3561600000 | -9.0750000000  |
| N60 | 12.8235900000 | -4.7071000000 | -8.8318800000  |
| C61 | 14.0391600000 | -5.0197000000 | -9.5707400000  |
| S62 | 11.3681100000 | -6.5348600000 | -10.1856300000 |
| H63 | 14.3207100000 | -6.0710900000 | -9.4087800000  |
| H64 | 14.8261600000 | -4.3502500000 | -9.2026200000  |
| H65 | 13.8757200000 | -4.8711500000 | -10.6482800000 |
| O66 | 13.8124100000 | -3.0762500000 | -7.5265400000  |
| H67 | 3.0331100000  | 4.5754200000  | 7.1989200000   |

Final single point energy = -4169.391419549399

Number of imaginary frequencies = 0

### Cartesian Coordinates for DTS13

|     |                |               |               |
|-----|----------------|---------------|---------------|
| C1  | -3.5532192960  | -2.2780864727 | 2.2985173503  |
| Si2 | -4.1783847890  | -0.9955275131 | 1.0662345644  |
| C3  | -4.4338125491  | -1.7579846749 | -0.6386956502 |
| C4  | -5.6853052310  | -0.0190900328 | 1.6873744554  |
| C5  | -7.0407038285  | -0.2038307865 | 2.0496915694  |
| C6  | -7.6923348173  | 0.9587945881  | 2.4522421354  |
| C7  | -9.0751008179  | 1.1293562402  | 2.8884638829  |
| C8  | -9.5411255649  | 2.3528073675  | 3.4231537629  |
| C9  | -10.8574439805 | 2.4981698867  | 3.8341002266  |
| C10 | -11.7878542781 | 1.4342360950  | 3.7379099079  |
| C11 | -13.1384102302 | 1.6890673445  | 4.1943575510  |
| C12 | -14.2860958706 | 0.9502886309  | 4.2519789253  |
| C13 | -14.6381818255 | -0.4452803448 | 3.8613035215  |
| C14 | -16.0927260612 | -0.6122969320 | 4.1856159752  |
| C15 | -16.8984918154 | -1.7362492226 | 4.0039510155  |
| C16 | -18.2418197333 | -1.6471489828 | 4.3867821547  |
| C17 | -18.7604030599 | -0.4608753076 | 4.9371883920  |
| C18 | -17.9473622423 | 0.6641394622  | 5.1180525281  |
| C19 | -16.6098821566 | 0.5694458293  | 4.7344999851  |
| C20 | -15.5249116930 | 1.5947472475  | 4.8068693725  |
| O21 | -15.6283960204 | 2.7286872860  | 5.2315137780  |
| O22 | -13.9409045859 | -1.3203832798 | 3.3752974000  |
| C23 | -11.3228922296 | 0.2072451560  | 3.2020768101  |
| C24 | -10.0057997191 | 0.0662682398  | 2.7908772582  |
| S25 | -6.5879682513  | 2.3290069509  | 2.3766404441  |
| C26 | -5.3000716570  | 1.3190947273  | 1.8183720630  |
| C27 | -3.9307012171  | 1.6412105164  | 1.4737210217  |
| C28 | -3.1259675816  | 0.5850849272  | 1.0347066566  |
| C29 | -1.8178231122  | 1.0263772541  | 0.7239023810  |
| C30 | -1.6096243858  | 2.3881063169  | 0.9214738439  |
| C31 | -0.3937622120  | 3.1669857162  | 0.7058144601  |
| C32 | -0.2463539169  | 4.4745795707  | 1.2227225021  |
| C33 | 0.9180920501   | 5.1976645306  | 1.0124265212  |
| C34 | 2.0026266817   | 4.6610466549  | 0.2757626827  |
| C35 | 3.1749138597   | 5.4962191323  | 0.1164051088  |

|     |                |               |               |
|-----|----------------|---------------|---------------|
| C36 | 4.3744859415   | 5.3534894603  | -0.5208826623 |
| C37 | 4.9901612957   | 4.2694672103  | -1.3400474003 |
| C38 | 6.3369617970   | 4.7800007566  | -1.7585000362 |
| C39 | 7.3008433403   | 4.1464588592  | -2.5429526652 |
| C40 | 8.4923046949   | 4.8350689700  | -2.7989038126 |
| C41 | 8.7093089855   | 6.1245749789  | -2.2799034794 |
| C42 | 7.7390492445   | 6.7558711326  | -1.4930270662 |
| C43 | 6.5539503580   | 6.0652323305  | -1.2421320227 |
| C44 | 5.3591724568   | 6.4860042157  | -0.4498387771 |
| O45 | 5.2152005646   | 7.5403342849  | 0.1369525405  |
| O46 | 4.5485089417   | 3.1740025786  | -1.6446445395 |
| C47 | 1.8553017494   | 3.3513170933  | -0.2450473389 |
| C48 | 0.6887479092   | 2.6314068134  | -0.0332926955 |
| S49 | -3.0856727189  | 3.1500059260  | 1.5061490341  |
| H50 | -4.2744939448  | -3.1057395325 | 2.4047463382  |
| H51 | -3.3971965434  | -1.8292481094 | 3.2919800736  |
| H52 | -2.5952738967  | -2.7089520146 | 1.9621699713  |
| H53 | -5.1757189640  | -2.5730680606 | -0.5974957576 |
| H54 | -3.4912360627  | -2.1813134503 | -1.0244226543 |
| H55 | -4.7913515619  | -1.0052737949 | -1.3586912166 |
| H56 | -7.5450214880  | -1.1713134501 | 2.0336021356  |
| H57 | -8.8573828685  | 3.1991660866  | 3.5257960705  |
| H58 | -11.1866040108 | 3.4563110155  | 4.2455105895  |
| H59 | -13.2911155764 | 2.7053145766  | 4.5845801092  |
| H60 | -16.4807157013 | -2.6500677645 | 3.5748057271  |
| H61 | -18.9013173648 | -2.5096589144 | 4.2576370224  |
| H62 | -19.8141864679 | -0.4214094976 | 5.2260897606  |
| H63 | -18.3351588780 | 1.5924505876  | 5.5442475096  |
| H64 | -12.0191845074 | -0.6274780498 | 3.1114945034  |
| H65 | -9.6914661837  | -0.8914548340 | 2.3720148045  |
| H66 | -1.0207837891  | 0.3662875694  | 0.3775173153  |
| H67 | -1.0519259000  | 4.9218980716  | 1.8103112024  |
| H68 | 1.0056926571   | 6.2046591793  | 1.4294821664  |
| H69 | 3.0963077239   | 6.4722307755  | 0.6159893423  |
| H70 | 7.1174992906   | 3.1447746173  | -2.9389798944 |
| H71 | 9.2684694121   | 4.3676397113  | -3.4108968874 |
| H72 | 9.6502532254   | 6.6373638610  | -2.4969728879 |



|     |              |              |               |
|-----|--------------|--------------|---------------|
| H73 | 7.8921023336 | 7.7568930841 | -1.0826986868 |
| H74 | 2.6714571401 | 2.9177893655 | -0.8245183536 |
| H75 | 0.6043195043 | 1.6332982398 | -0.4672919396 |

Final single point energy = -2999.952583385568

Number of imaginary frequencies = 0

## Dynamic Light Scattering Results

**Table S3:** Dynamic light scattering results for nanoparticles of **DTSRh**, **DTS13**, **PNF222** and combinations thereof.

|                           | $Z_{avg}$ (nm) | PDI   |
|---------------------------|----------------|-------|
| <b>DTSRh</b>              | 24.58          | 0.297 |
| <b>DTS13</b>              | 33.27          | 0.181 |
| <b>PNF222</b>             | 88.51          | 0.491 |
| <b>DTSRh:PNF222 (3:1)</b> | 47.01          | 0.144 |
| <b>DTSRh:PNF222 (1:1)</b> | 55.93          | 0.196 |
| <b>DTSRh:PNF222 (1:3)</b> | 61.40          | 0.261 |
| <b>DTSRh:PNF222 (3:1)</b> | 51.40          | 0.161 |
| <b>DTSRh:PNF222 (1:1)</b> | 49.81          | 0.267 |
| <b>DTSRh:PNF222 (1:3)</b> | 50.91          | 0.295 |

**Table S4:** Dynamic light scattering results for **DTS13:PNF222 (1:1)** nanoparticles and also in the presence of either ascorbic acid (AA, black and red trace) or triethylamine (TEA, green and blue trace) before and after photoirradiation (solution degassed with  $N_2$ , 1.5 AG filter and 300 W Xe light source used for photoirradiation).

|                                                      | Sacrificial oxidant | $Z_{avg}$ (nm) | PDI   |
|------------------------------------------------------|---------------------|----------------|-------|
| <b>DTS13:PNF222 (1:1)</b><br>Before photoirradiation | AA                  | 91.35          | 0.392 |
| <b>DTS13:PNF222 (1:1)</b><br>After photoirradiation  | AA                  | 71.88          | 0.291 |
| <b>DTS13:PNF222 (1:1)</b><br>Before photoirradiation | TEA                 | 68.55          | 0.390 |
| <b>DTS13:PNF222 (1:1)</b><br>After photoirradiation  | TEA                 | 53.54          | 0.330 |

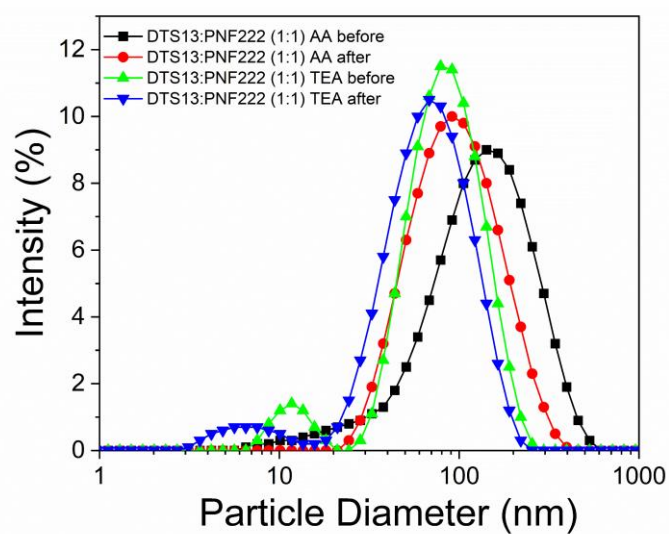

**Figure S8:** Dynamic light scattering results for **DTS13:PNF222** (1:1) nanoparticles in the presence of either ascorbic acid (AA, black and red trace) or triethylamine (TEA, green and blue trace) before and after photoirradiation (solution degassed with N<sub>2</sub>, 1.5 AG filter and 300 W Xe light source used for photoirradiation).

## Additional Photocatalysis Figures

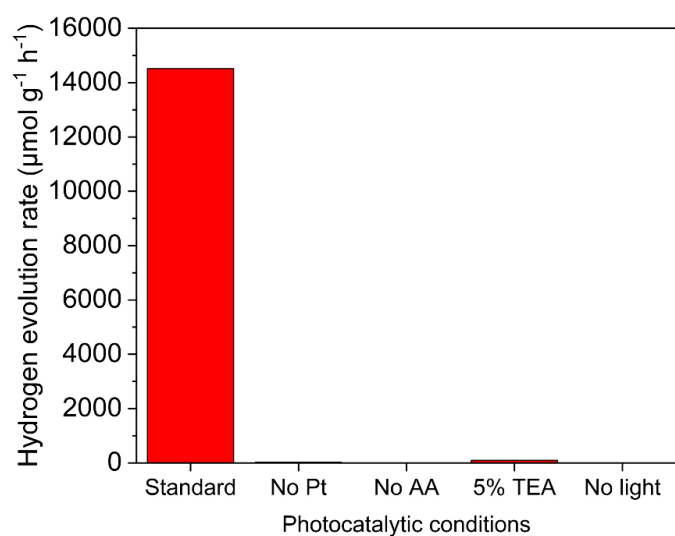

**Figure S9:** Control experiments relevant to the **DTS13:PNF222** (1:1) nanoparticles (as standard) including the absence of platinum cocatalyst, ascorbic acid (AA), triethylamine (TEA) used as an alternative sacrificial agent, and no light respectively. Experimental conditions: 2 mg nanoparticles from 0.5 mg/mL dispersions, the solution made up to a total volume up to 25 mL and degassing with  $\text{N}_2$ , atmospheric pressure, irradiated with a 300 W Xe light source equipped with an AM1.5G filter.

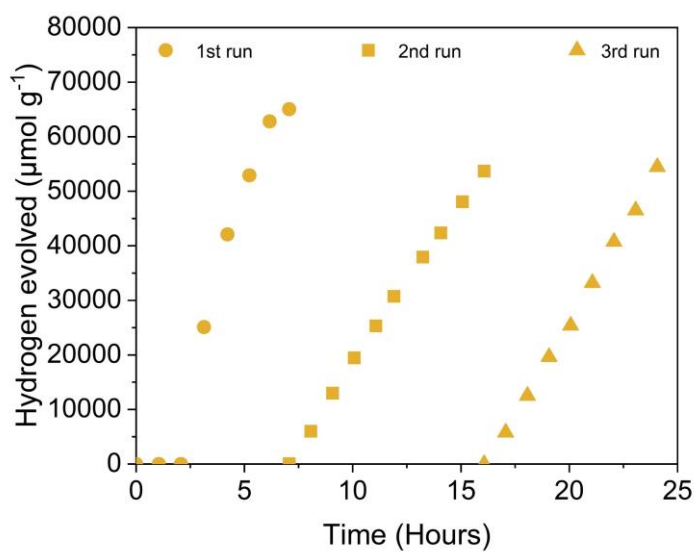

**Figure S10:** Mass normalised hydrogen evolution rate of **DTS13:PNF222** (1:1) ncBHJ nanoparticles over longer timescales. The first run started with two hours in the dark then the light source was initiated. After the first run, the photocatalytic reaction was degassed then the second run was commenced with the light source. Following the second run the photocatalytic reaction was degassed again and 5 mmol AA were added. Experimental conditions: 4 mL of a 0.5 mg mL<sup>-1</sup> nanoparticle dispersion to obtain 2 mg of nanoparticles, 10 wt. % Pt (1.25 mL from a 0.4 mg mL<sup>-1</sup> aqueous K<sub>2</sub>PtCl<sub>6</sub> solution), 19.75 mL of a 0.2 M AA solution added to make the total volume up to 25 mL, degassed by nitrogen bubbling, irradiated with a 300 W Xe light source equipped with AM 1.5G filter).

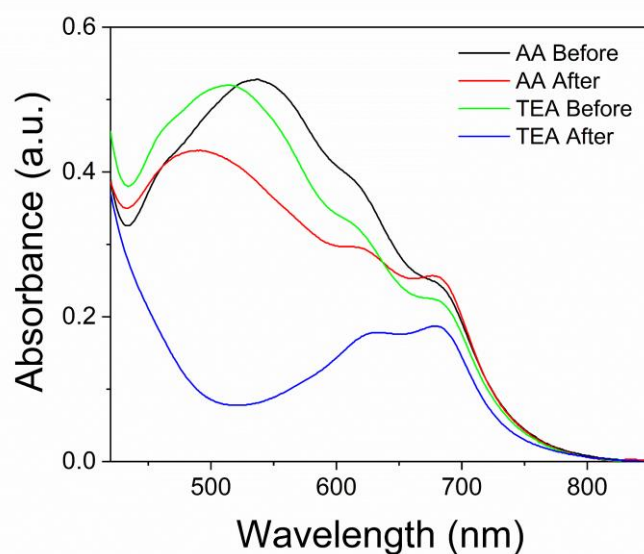

**Figure S11:** UV-vis spectroscopy of **DTS13:PNF222** (1:1) nanoparticles before and after photoirradiation (solution degassed with  $N_2$ , 300 W Xe light source equipped with an AM1.5G filter used for photoirradiation) using ascorbic acid (AA, black and red trace) and triethylamine (TEA, green and blue trace).

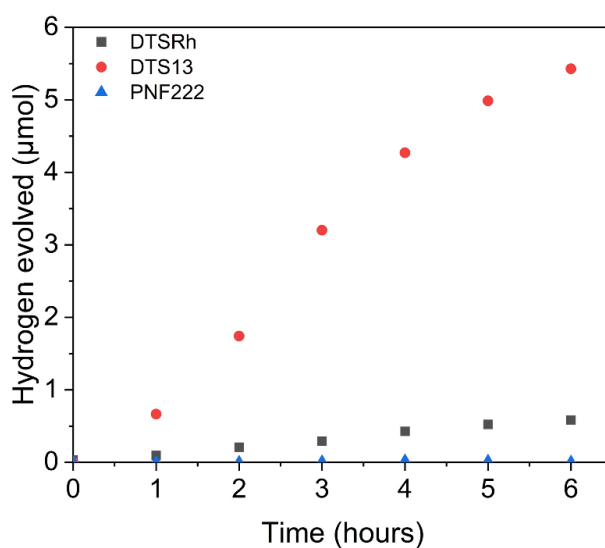

**Figure S12:** Photocatalytic hydrogen evolution experiment of the single component nanoparticles used in this study. Experimental conditions: 2 mg nanoparticles from  $0.5 \text{ mg mL}^{-1}$  dispersions, 10 wt% Pt loading (1.25 mL from a  $0.4 \text{ mg mL}^{-1}$  aqueous  $K_2PtCl_6$  solution), 0.2 M ascorbic acid solution added to make the total volume up to 25 mL and degassing with  $N_2$ , atmospheric pressure, irradiated with a 300 W Xe light source equipped with an AM1.5G filter.

**Table S5.** Literature examples of photocatalytic hydrogen evolution performance of BHJ nanoparticles.

| Entry | BHJ components             | Cocatalyst loading (wt% Pt) | Sacrificial reagent <sup>a</sup> | HER ( $\mu\text{mol g}^{-1} \text{h}^{-1}$ ) <sup>b</sup> | Surfactant               | EQE / AQY                  | Ref.              |
|-------|----------------------------|-----------------------------|----------------------------------|-----------------------------------------------------------|--------------------------|----------------------------|-------------------|
| 1     | DTS13/PNF222               | 10                          | 0.2 M AA<br>pH 2                 | 22,300                                                    | SDS                      | /                          | <b>This study</b> |
| 2     | PTB7-Th/EH-IDTBR           | 10                          | 0.2 M AA<br>pH 2                 | 3,100 <sup>c</sup>                                        | SDS                      | /                          | 13                |
| 3     | PTB7-Th/EH-IDTBR           | 10                          | 0.2 M AA<br>pH 2                 | 64,400 <sup>c</sup>                                       | TEBS                     | 6.2%<br>EQE at<br>700 nm   | 13                |
| 4     | PCDTBT/PC <sub>60</sub> BM | 3                           | 0.04 M<br>AA                     | 105,000                                                   | THF<br>nanoprecipitation | 3.72%<br>AQY at<br>420 nm  | S17               |
| 5     | PFBT/PFODTBT/ITIC          | 6                           | 0.8 M AA<br>pH 4                 | 60,800                                                    | PS-PEG-COOH              | 7%<br>EQE at<br>600 nm     | S18               |
| 6     | PM6/ITCC-M                 | 10                          | 0.2 M AA<br>pH 2.4               | 260,000 <sup>c</sup>                                      | SDBS                     | /                          | S19               |
| 7     | PM6/ITCC-M/IDMIC-4F        | 10                          | 0.2 M AA<br>pH 2.4               | 306,000 <sup>c</sup>                                      | SDBS                     | 5.9%<br>AQY at<br>600 nm   | S19               |
| 8     | gIDTBT/oIDTBR              | 10                          | 0.2 M AA<br>pH 2                 | 18,500 <sup>c</sup>                                       | TEBS                     | 5.3%<br>EQE at<br>400 nm   | S20               |
| 9     | PM6/Y6                     | 10                          | 0.2 M AA<br>pH 2                 | 43,900 <sup>c</sup>                                       | TEBS                     | 5%<br>EQE at<br>800 nm     | S21               |
| 10    | PM6/PC <sub>71</sub> BM    | 5                           | 0.2 M AA<br>pH 2                 | 73,700 <sup>c</sup>                                       | TEBS                     | 8.7%<br>EQE at<br>400 nm   | S21               |
| 11    | PM6/BTP-4F                 | 15                          | 0.2 M AA                         | 64,300                                                    | TEBS                     | 7.12%<br>EQE at<br>800 nm  | S22               |
| 12    | PM6/BTP-FOH                | 15                          | 0.2 M AA                         | 78,400                                                    | TEBS                     | 8.35%<br>EQE at<br>800 nm  | S22               |
| 13    | PM6/BTP-2OH                | 15                          | 0.2 M AA                         | 102,100                                                   | TEBS                     | 9.17%<br>EQE at<br>800 nm  | S22               |
| 14    | PM6/TPP                    | 20                          | 0.2 M AA<br>pH 2                 | 72,700 <sup>c</sup>                                       | TEBS                     | 8.55%<br>EQE at<br>800 nm  | S23               |
| 15    | PM6/Y6CO                   | 33                          | 0.2 M AA                         | 323,200 <sup>c</sup>                                      | TEBS                     | 11.58%<br>EQE at<br>700 nm | S24               |
| 16    | PBDB-T/ITIC                | 10                          | 0.2 M AA<br>pH 3                 | 257,000 <sup>c</sup>                                      | SDBS                     | 9.9%<br>AQY at<br>650 nm   | S25               |
| 17    | POZ-M/ITIC                 | 6                           | 0.2 M AA<br>pH 4                 | 63,000                                                    | PS-PEG-COOH              | 0.8%<br>EQE at<br>450 nm   | S26               |
| 18    | PS/PBT                     | 3                           | 0.2 M AA                         | 65,000 <sup>c</sup>                                       | THF<br>nanoprecipitation | 8.85%<br>EQE at<br>405 nm  | S27               |

<sup>a</sup> In some literature examples the pH is not explicitly stated but presumed to be unaltered which is pH 2 for a solution of ascorbic acid. <sup>b</sup> HER rounded to the nearest hundred. <sup>c</sup> Either reduced pressure is used or pressure is not explicitly stated in the photocatalytic reaction conditions.

## Supplementary Information References

- S1 S. C. Virgil, P. R. Jenkins, A. J. Wilson, M. D. García Romero, *N-Bromosuccinimide*. In *Encyclopedia of Reagent for Organic Synthesis*, Wiley, **2006**.  
<https://doi.org/10.1002/047084289X.rb318.pub2>
- S2 A. M. Brouwer. Standards for photoluminescence quantum yield measurements in solution (IUPAC Technical Report). *Pure Appl. Chem.* **2011**, *83* (12), 2213.
- S3 S. Trasatti. The Absolute Electrode Potential: An Explanatory Note. *Pure Appl. Chem.* **1986**, *58* (7), 955.
- S4 N. G. Connelly, W. E. Geiger, Chemical Redox Agents for Organometallic Chemistry. *Chem. Rev.* **1996**, *96* (2), 877.
- S5 A. J. Bard, L. R. Faulkner. *Electrochemical Methods: Fundamentals and Applications*, Wiley, New York, 2001.
- S6 F. Neese. Software update: The ORCA program system—Version 5.0. *WIREs Comput. Mol. Sci.* **2022**, *12* (5), e1606.
- S7 A. D. Becke. Density-functional thermochemistry. III. The role of exact exchange. *J. Chem. Phys.* **1993**, *98* (7), 5648.
- S8 F. Weigend and R. Ahlrichs. Balanced basis sets of split valence, triple zeta valence and quadruple zeta valence quality for H to Rn: Design and assessment of accuracy. *Phys. Chem. Chem. Phys.* **2005**, *7* (18), 3297.
- S9 F. Weigend. Accurate Coulomb-fitting basis sets for H to Rn. *Phys. Chem. Chem. Phys.* 2006, **8**, 1057.
- S10 J. Ohshita, M. Nodono, T. Watanabe, Y. Ueno, A. Kunai, Y. Harima, K. Yamashita and M. Ishikawa. Synthesis and properties of dithienosiloles. *J. Organomet. Chem.* 1998, **553**, 487.
- S11 Q. Zhang, Y. Sun, X. Chen, Z. Lin, X. Ke, X. Wang, T. He, S. Yin, Y. Chen and H. Qiu. An A<sub>2</sub>-π-A<sub>1</sub>-π-A<sub>2</sub>-type small molecule donor for high-performance organic solar cells *J. Mater. Chem. C*, 2019, **7**, 5381.
- S12 M. Takahashi, K. Masui, H. Sekiguchi, N. Kobayashi, A. Mori, M. Funahashi and N. Tamaoki. Palladium-Catalyzed C-H Homocoupling of Bromothiophene Derivatives and Synthetic Application to Well-Defined Oligothiophenes. *J. Am. Chem. Soc.* 2006, **128**, 10930.
- S13 J.- H. Huang, C.- M. Teng, Y.- S. Hsiao, F.- W. Yen, P. Chen, F.- C. Chang and C.- W. Chu. Nanoscale Correlation between Exciton Dissociation and Carrier Transport in Silole-Containing Cyclopentadithiophene-Based Bulk Heterojunction Films. *J. Phys. Chem. C*, 2011, **115**, 2398.
- S14 J. Ohshita, M. Nodono, H. Kai, T. Watanabe, A. Kunai, K. Komaguchi, M. Shiotani, A. Adachi, K. Okita, Y. Harima, K. Yamashita and M. Ishikawa. Synthesis and Optical, Electrochemical, and Electron-Transporting Properties of Silicon-Bridged Bithiophenes. *Organometallics*, 1999, **18**, 1453.



- S15 A. A. El-Shehawy, N. I. Abdo, M. M. El-Hendawy, A.- R. I. A. Abdallah and J. S. Lee, *J. Phys. Org. Chem.* 2020, **33** (8), e4063.
- S16 <https://www.ossila.com/products/pnf222> Accessed (07/05/2024)
- S17 H. Yang, X. Li, R. S. Sprick and A. I. Cooper, Conjugated polymer donor-molecular acceptor nanohybrids for photocatalytic hydrogen evolution. *Chem. Commun.* **2020**, 56 (50), 6790.
- S18 A. Liu, L. Gedda, M. Axelsson, M. Pavliuk, K. Edwards, L. Hammarström, and H. Tian, Panchromatic Ternary Polymer Dots Involving Sub-Picosecond Energy and Charge Transfer for Efficient and Stable Photocatalytic Hydrogen Evolution. *J. Am. Chem. Soc.* **2021**, 143 (7), 2875.
- S19 Y. Yang, D. Li, J. Cai, H. Wang, C. Guo, S. Wen, W. Li, T. Wang, D. Liu, Enhanced Photocatalytic Hydrogen Evolution from Organic Ternary Heterojunction Nanoparticles Featuring a Compact Alloy-Like Phase. *Adv. Funct. Mater.* **2023**, 33 (10), 2209643.
- S20 J. Kosco, S. Gonzalez-Carrero, C. T. Howells, W. Zhang, M. Moser, R. Sheelamanthula, L. Zhao, B. Willner, T. C. Hidalgo, H. Faber, B. Purushothaman, M. Sachs, H. Cha, R. Sougrat, T. D. Anthopoulos, S. Inal, J. R. Durrant, I. McCulloch, Oligoethylene Glycol Side Chains Increase Charge Generation in Organic Semiconductor Nanoparticles for Enhanced Photocatalytic Hydrogen Evolution. *Adv. Mater.* **2022**, 34 (22), 2105007.
- S21 J. Kosco, S. Gonzalez-Carrero, C. T. Howells, T. Fei, Y. Dong, R. Sougrat, G. T. Harrison, Y. Firdaus, R. Sheelamanthula, B. Purushothaman, F. Moruzzi, W. Xu, L. Zhao, A. Basu, S. De Wolf, T. D. Anthopolous, J. R. Durrant, I. McCulloch, Generation of long-lived charges in organic semiconductor heterojunction nanoparticles for efficient photocatalytic hydrogen evolution. *Nat. Energy*, **2022**, 7 (4), 340.
- S22 X. Liu, Y. Zhao, Y. Ni, F. Shi, X. Guo, C. Li. Hydroxylated organic semiconductors for efficient photovoltaics and photocatalytic hydrogen evolution. *Energy Environ. Sci.* **2023**, 16 (9), 4065.
- S23 Z. Zhang, W. Si, B. Wu, W. Wang, Y. Li, W. Ma, Y. Lin. Two-Dimensional Polycyclic Photovoltaic Molecule with Low Trap Density for High-Performance Photocatalytic Hydrogen Evolution. *Angew. Chem. Int. Ed.* **2022**, 61 (10), e202114234
- S24 Y. Liang, T. Li, Y. Lee, Z. Zhang, Y. Li, W. Si, Z. Liu, C. Zhang, Y. Qiao, S. Bai, Y. Lin. Organic Photovoltaic Catalyst with  $\sigma$ - $\pi$  Anchor for High-Performance Solar Hydrogen Evolution, *Angew. Chem. Int. Ed.* **2023**, 62 (12), 202217989.
- S25 Y. Yang, D. Li, P. Wang, X. Zhang, H. Zhang, B. Du, C. Guo, T. Wang, D. Liu. Polymer/non-fullerene acceptor bulk heterojunction nanoparticles for efficient photocatalytic hydrogen production from water. *Polymer*, **2022**, 244, 124667.
- S26 M. V. Pavliuk, S. Wrede and H. Tian. Phenoxazine-based small molecule heterojunction nanoparticles for photocatalytic hydrogen production. *Chem. Commun.*, **2023**, 59 (37), 5611.

- S27 M. Yu, W. Zhang, X. Liu, G. Zhao, J. Du, Y. Wi, W.-H. Zhu. Energy transfer enhanced photocatalytic hydrogen evolution in organic heterostructure nanoparticles via flash nanoprecipitation processing. *Green Energy Environ.*, **2024**, advance article.
